1 **ORIGINAL RESEARCH**

2

3 **Application of synthetic peptide CEP1 increases nutrient uptake rates along plant roots**

4

5 Sonali Roy<sup>1,2#</sup>, Marcus Griffiths<sup>1,3#</sup>, Ivone Torres-Jerez<sup>1,4</sup>, Bailey Sanchez<sup>1</sup>, Elizabeth  
6 Antonelli<sup>1</sup>, Divya Jain<sup>2</sup>, Nicholas Krom<sup>1</sup>, Shulan Zhang<sup>1</sup>, Larry M. York<sup>1,5</sup>, Wolf-Rüdiger  
7 Scheible<sup>1\*</sup>, Michael K. Udvardi<sup>1,6\*</sup>

8

9 <sup>1</sup> Noble Research Institute LLC, Ardmore, OK, 73401, USA

10 <sup>2</sup> Tennessee State University, College of Agriculture, Nashville, TN, 37209, USA

11 <sup>3</sup> Present address: Donald Danforth Plant Science Center, St. Louis, MO, 63132, USA

12 <sup>4</sup> Present address: Institute of Agricultural Biosciences, Oklahoma State University, Ardmore,  
13 OK, 73401, USA

14 <sup>5</sup> Present address: Biosciences Division and Center for Bioenergy Innovation, Oak Ridge  
15 National Laboratory, Oak Ridge, TN, 37830, USA

16 <sup>6</sup> Present address: Queensland Alliance for Agriculture and Food Innovation, The University  
17 of Queensland, Brisbane, Australia

18

19 #Authors contributed equally

20

21 \*Author for correspondence [wrscheible@noble.org](mailto:wrscheible@noble.org) and [m.udvardi@uq.edu.au](mailto:m.udvardi@uq.edu.au)

22

23 Sonali Roy (0000-0002-8114-8300)

24 Marcus Griffiths (0000-0003-2349-8967)

25 Ivone Torres-Jerez (0000-0001-9264-4652)

26 Elizabeth Antonelli (0000-0003-3910-409)

27 Divya Jain (0000-0002-9595-9008)

28 Nicholas Krom (0000-0002-7973-8037)

29 Shulan Zhang (0000-0003-3639-5211)

30 Larry M. York (0000-0002-1995-9479)

31 Wolf-Rüdiger Scheible (0000-0003-4363-4196)

32 Michael Udvardi (0000-0001-9850-0828)

33

34

## 1 Abstract

2 The root system of a plant provides vital functions including resource uptake, storage, and  
3 anchorage in soil. Uptake from the soil of macro-nutrients like nitrogen (N), phosphorus (P),  
4 potassium (K), and sulphur (S) is critical for plant growth and development. Small signaling  
5 peptide (SSP) hormones are best known as potent regulators of plant growth and development  
6 with a few also known to have specialized roles in macronutrient utilization. Here we describe  
7 a high-throughput screen of SSP effects on root uptake of multiple nutrients. The SSP,  
8 MtCEP1 enhanced nitrate uptake rate per unit root length in *Medicago truncatula* plants  
9 deprived of N. MtCEP1 and AtCEP1 enhanced uptake not only of nitrate, but also phosphate  
10 and sulfate in both *Medicago* and *Arabidopsis*. Transcriptome analysis of *Medicago* roots  
11 treated with different MtCEP1 encoded peptide domains revealed that hundreds of genes  
12 respond to these peptides, including several nitrate transporters and a sulfate transporter that  
13 may mediate the uptake of these macronutrients downstream of CEP1 signaling. Likewise,  
14 several putative signaling pathway genes were induced in roots by CEP1 treatment. Thus, a  
15 scalable method has been developed for screening synthetic peptides of potential use in  
16 agriculture, with CEP1 shown to be one such peptide.

## 17 Introduction

18 The root system of a plant provides vital functions including resource uptake, storage, and  
19 anchorage in soil. For plant growth and development, uptake from the soil of macronutrients,  
20 i.e. nitrogen (N), phosphorus (P), potassium (K), and sulphur (S), and micronutrients is critical  
21 (Hawkesford and Barraclough, 2011). Soil macronutrients are often present at limiting  
22 concentrations for optimal crop yield. Therefore chemical fertilizers are widely used to enrich  
23 soils and enhance crop productivity, although their use comes at significant economic and  
24 environmental costs (Fageria, 2008). Currently, fertilizer use in agriculture is neither  
25 sustainable nor efficient; with as little as 10-30% of applied fertilizer being captured by crop  
26 roots (Wortmann, 2014), leading to fertilizer losses through leaching, erosion and gaseous  
27 emissions, with concomitant eutrophication of inland and marine waters and addition of  
28 greenhouse gases to the atmosphere. Hence, understanding the molecular mechanisms  
29 governing plant nutrient uptake, which may enable new approaches to increase the efficiency  
30 of fertilizer use, is important.

31  
32 Small signaling peptides (SSPs), also called peptide hormones, are best known for their  
33 influence on plant growth and development, with a few peptides also known to influence  
34 nutrient uptake and/or assimilation (Matsubayashi, 2014; de Bang et al., 2017a; Roy et al.,  
35 2018). The role of SSPs in regulating root system architecture in response to biotic and abiotic  
36 factors is of growing interest. Plant genomes may encode thousands of SSPs. For example,  
37 1800 putative SSP genes have been annotated in the legume, *Medicago truncatula*, while  
38 >1000 have been identified in *Arabidopsis thaliana* (Ghorbani et al., 2015; de Bang et al.,  
39 2017b). SSPs, which result from processing of longer, precursor polypeptides, range in size  
40 from between 5-75 amino acids and are perceived by plasma-membrane receptors of the  
41 leucine-rich repeat receptor like kinase (LRR-RLK) class (Wang et al., 2020). Peptides are  
42 usually encoded in the C-terminal part of the precursor polypeptide and have conserved  
43 residues within their sequences that are shared with other SSPs of the same “family”

1 (Tavormina et al., 2015). SSP family members often control similar processes (Murphy et al.,  
2 2012). However, variation within families of a given species is also known to exist (Ogilvie et  
3 al., 2014). Additionally, sequences are often conserved across species explaining activity of  
4 peptides in distantly related species (Oelkers et al., 2008; Hastwell et al., 2017). SSPs can  
5 exert their effects locally or systemically because of the ability of some to be transported via  
6 the vasculature (Notaguchi and Okamoto, 2015). Chemically synthesized forms of SSP may  
7 be recognized by cell-surface receptors thereby retaining their morphogenic properties  
8 (Okuda et al., 2009; Imin et al., 2013). Synthetic peptides therefore provide an invaluable tool  
9 for researchers to uncover novel functions of plant SSPs within days of peptide treatment.  
10 Interestingly, some synthetic peptides with no apparent homology to plant- SSPs can also  
11 alter plant development, opening up interesting avenues for the development of novel plant  
12 growth and physiology regulators (Bao et al., 2017).

13  
14 In *Arabidopsis thaliana*, the peptide AtCEP1 (C-TERMINALLY ENCODED PEPTIDE) is  
15 induced in roots grown in soils with heterogeneous nitrogen availability (Tabata et al., 2014;  
16 Ohkubo et al., 2017). Application of synthetic AtCEP1 induced expression of the nitrate uptake  
17 transporters *AtNRT1.1/AtNPF6.3* (*NITRATE TRANSPORTER 1.1/NITRATE PEPTIDE*  
18 *TRANSPORTER FAMILY 6.3*), *AtNRT2.1* and *AtNRT3.1* in roots, indicating a role for AtCEP1  
19 in nitrate absorption (Tabata et al., 2014). Although some studies have shown that SSPs can  
20 affect nutrient uptake, few, if any, systematic screens have been undertaken to identify  
21 physiological effects of synthetic peptides. Here, we have established a hydroponics-based  
22 plant growth system and an effective protocol for measuring the effects of synthetic SSPs on  
23 depletion rates from the medium of a range of different nutrients, using ion chromatography.  
24 We demonstrate the reliability of this system in measuring higher nitrate uptake rates 48 hours  
25 post treatment with the *M. truncatula* orthologue of AtCEP1 peptide, MtCEP1, compared to a  
26 no-peptide treatment. Surprisingly, we found that synthetic CEP peptides also enhanced root  
27 uptake of phosphate and sulfate. RNAseq analysis showed that MtCEP1 Domain1 peptide  
28 had the strongest effect on the *Medicago* root transcriptome and revealed putative new targets  
29 of CEP1 signaling.

30

## 31 **Materials and Methods**

### 32 ***Hydroponic plant growth***

33 *Medicago truncatula*: *M. truncatula* jemalong A17 seeds were scarified, sterilized, plated on  
34 water agarose medium and transferred to 4°C for three days in the dark. Seeds were allowed  
35 to germinate in the dark at 23°C for 16 hours. Germinated seedlings were transferred to  
36 Broughton & Dilworth (B&D) nutrition medium (with 1% Agarose) in ‘filter paper sandwich’  
37 systems and grown under short-day conditions (8-/16-h day/night cycle) with 120 mol m<sup>2</sup> s<sup>-1</sup>  
38 light for four days (Breakspear et al., 2014). Four day old seedlings were sown in cutouts of  
39 Identi-Plug foam (Jaece Industries Inc., NY, USA) and 15 mL falcon tubes with the bottom  
40 cone cut away, and placed into aerated hydroponic tanks containing B&D full nutrition medium  
41 (Table S1) (Figure 1A). Plants were grown under short-day conditions in Conviron walk-in  
42 plant growth rooms at 22 °C temperature and 120 mol m<sup>2</sup> s<sup>-1</sup> light for 11 additional days. Prior  
43 to the uptake experiment, the plants were then transferred to a macronutrient-free nutrient  
44 solution (500 μM CaCl<sub>2</sub>, 1000 μM MES) with the respective peptide treatment of 1 μM and  
45 micronutrients unless otherwise stated, for 48 hours before measurement (Figure 1B).

1  
2 Arabidopsis: *A. thaliana* Columbia-0 seeds were surface sterilized (50% Bleach followed by  
3 75% ethanol treatment) and plated aseptically on ½ Murashige & Skoog (with 0.4 % (w/v)  
4 Gelzan) and transferred to 4 °C. After two days the seedlings were transferred to 22 °C and  
5 grown under short-day conditions (8-/16-h day/night cycle) with 120 mol m<sup>2</sup> s<sup>-1</sup> light for four  
6 days or till roots were about 1 cm long. These seedlings were then transferred to Falcon 6-  
7 well culture plates (Corning, Arizona, USA) containing 5 mL of liquid ½ MS and grown for 10  
8 days on a shaker (80 rpm, New Brunswick platform shaker). Ten plants were pooled together  
9 per well to make a biological replicate. The plants were then transferred to a macronutrient-  
10 free solution with 1 µM AtCEP1 peptide treatment (Pepscan, the Netherlands), 48 hours prior  
11 to the uptake experiment, in order to promote uptake induction.

### 12 ***Determination of nutrient uptake rates by plant roots using ion chromatography***

13 For the nutrient uptake experiment, plants were processed following the RhizoFlux ions  
14 protocol with modifications (Griffiths et al., 2021). A custom ion uptake analysis assay was  
15 used with individual plant hydroponic chamber control of nutrient solutions or treatments. The  
16 setup consisted of 24 chambers coupled to two peristaltic pumps for nutrient sampling and  
17 aeration (Ismatec ISM944A, Cole-Parmer Instrument Company LLC., IL, USA) (Figure 1C).  
18 For the Arabidopsis experiments the plants were grown on a shaker and nutrient sampling  
19 was conducted with a pipette. Each chamber was filled with a procedure solution containing  
20 the respective peptide treatment and macronutrients: (in µM) 100 KNO<sub>3</sub>, 100 NH<sub>4</sub>Cl, 12.5  
21 Ca(H<sub>2</sub>PO<sub>4</sub>)<sub>2</sub>H<sub>2</sub>O, 25 MgSO<sub>4</sub>, 487.5 CaCl<sub>2</sub>, 1000 MES (adjusted to pH6.8 using NaOH). The  
22 procedure solution volume used in the Medicago experiments was 35 mL per plant and for the  
23 Arabidopsis experiments 15 mL per pool was used. Two minutes after the macronutrient-  
24 starved plants were transferred to the individual chambers the first 650 µL nutrient sample  
25 was collected. Nutrient solution samples were taken between 0 and 4 h on a deep-well  
26 collection plate and the plate was transferred to 4 °C for short term storage and if necessary  
27 to -20 °C for long term storage. After the nutrient uptake experiment, the plants were  
28 immediately transferred to 4 °C in plastic bags for later root image processing. Ion  
29 concentrations of the collected nutrient solution samples were determined using a Thermo  
30 Scientific ICS-5000+ ion chromatographic system (Thermo Fisher Scientific, MA, USA) and  
31 the data processed to give nutrient concentrations using the Chromeleon 7.2 SR4 software  
32 (Thermo Fisher Scientific, MA, USA) (Figure 1D).

### 33 ***RNA extraction and quantitative PCR***

34 To investigate nutrient responsive effects in *M. truncatula* Jemalong A17, plants were first  
35 germinated and grown on full nutrient plates. Four day old seedlings were then transferred to  
36 low nitrate (50 µM NH<sub>4</sub>NO<sub>3</sub>), low P (6 µM KH<sub>2</sub>PO<sub>4</sub>) and sulfate free B & D media (Table S2).  
37 After 48 hours, root material from 20 seedlings per biological replicate, was harvested and  
38 immediately frozen in liquid nitrogen. For RNA sequencing, three day old Medicago  
39 truncatula seedlings grown on water agarose (Life Technologies) medium were treated with 1  
40 µM MtCEP1D1, MtCEP1D2 and AtCEP1 peptide concentrations in water for three hours. For  
41 all three biological replicates 20-30 seedling roots were used

42  
43 Trizol reagent was used to extract total RNA (Life Technologies) following the manufacturer's  
44 protocol (Invitrogen GmbH, Karlsruhe, Germany). Total DNA was digested with RNase free

1 DNase1 (Ambion Inc., Houston, TX) and column purified with RNeasy MinElute CleanUp Kit  
2 (Qiagen). RNA was quantified using a Nanodrop Spectrophotometer ND-100 (NanoDrop  
3 Technologies, Wilmington, DE). RNA integrity was assessed on an Agilent 2100 BioAnalyser  
4 and RNA 6000 Nano Chips (Agilent Technologies, Waldbronn, Germany). First-strand  
5 complementary DNA was synthesized by priming with oligo-dT<sub>20</sub> (Qiagen, Hilden, Germany),  
6 using Superscript Reverse Transcriptase III (Invitrogen GmbH, Karlsruhe, Germany) following  
7 manufacturer's protocol. Primers were designed using Primer Express V3.0 software. qPCR  
8 reactions were carried out in QuantStudio7 (ThermoFisher Scientific Inc.). Five microliters  
9 reactions were performed in an optical 384-well plate containing 2.5  $\mu$ L SYBR Green Power  
10 Master Mix reagent (Applied Biosystems), 15 ng cDNA and 200 nM of each forward and  
11 reverse gene-specific primer. Transcript levels were normalized using the geometric mean of  
12 two housekeeping genes, *MtUBI* (Medtr3g091400) and *MtPTB* (Medtr3g090960). Three  
13 biological replicates were included and displayed as relative expression values. Primer  
14 sequences are provided in **Supplementary Table 4**.

15

### 16 ***RNA-Seq and gene expression analyses***

17 One microgram of total RNA was used to generate RNA-seq libraries using TruSeq Stranded  
18 mRNA Library Prep Kit (Illumina Inc.) according to the manufacturer's protocol. Prior to library  
19 construction, RNA integrity and quality were assessed with TapeStation 4200 (Agilent) and  
20 only an RNA integrity number (RIN) above nine was used. Size distribution of RNA-seq  
21 libraries was analyzed using TapeStation and the libraries were quantified using the Qubit 2.0  
22 Fluorometer (ThermoFisher Scientific) before being shipped to Novogene Inc. for sequencing  
23 at 150 bp paired-end with an Illumina Hiseq2000 (Illumina). Data are available on NCBI under  
24 SRA number PRJNA764762.

### 25 ***Root architecture phenotyping***

26 Roots were imaged using a flatbed scanner equipped with a transparency unit (Epson  
27 Expression 12000XL, Epson America Inc, CA, USA). The roots were cut away from the shoots,  
28 spread out on a transparent plexiglass tray (420 mm x 300 mm) with a 5 mm layer of water  
29 (400 mL), imaged in grayscale at a resolution of 600 dpi, and the total root length for each  
30 image was analyzed using RhizoVision Explorer v2.0.1 (Seethepalli et al., 2021). One root  
31 scan was performed per biological replicate for the uptake experiments, with one scan per  
32 Medicago plant, and one scan per pool of Arabidopsis plants.

### 33 ***Statistical analyses and data evaluation***

34 For the nutrient uptake rate study, data processing to determine specific nutrient uptake rates  
35 was conducted using R version 3.6.0 (Team, 2020)(R Development Core Team, 2020) with  
36 minor modification to the R code available at <https://doi.org/10.5281/zenodo.3893945>  
37 (Griffiths et al., 2021). The net nutrient depletion and therefore uptake rate by roots was  
38 calculated by  $In = (C_t - C_0) / (t_0 - t)$  where *In* is the net influx into the plant; *C*<sub>0</sub> is the initial  
39 concentration of the solution at the start of the experiment *t*<sub>0</sub>; *C*<sub>*t*</sub> is the concentration at  
40 sampling time. The net uptake rate was then divided by the root system length (cm) to  
41 calculate the net specific nutrient uptake rate with the units  $\mu$ mol cm<sup>-1</sup> h<sup>-1</sup>. Statistical tests were  
42 conducted using Graphpad V. 8. The bar in the box plots represents the median values, with  
43 each box representing the upper and lower quartiles, and the whiskers representing the  
44 minimum and maximum values.

## 1 **RNA-Seq mapping and hierarchical clustering**

2 Low quality bases and primer/adaptor sequences were removed for quality trimming of each  
3 sample using Trimmomatic version 0.36 (<http://www.usadellab.org/cms/?page=trimmomatic>).  
4 Reads less than 30 bases long after trimming were discarded, along with their mate pair. Using  
5 HISAT2 version 2.0.5 (<https://daehwankimlab.github.io/hisat2/>) default mapping parameters  
6 and 24 threads, trimmed reads were mapped to an in-house mapped to an in-house re-  
7 annotated version of the *M. truncatula* genome release 4.0\_reanno (<http://bioinfo3.noble.org/>).  
8 Transcripts were assembled and quantified using Stringtie 1.2.4  
9 (<http://www.ccb.jhu.edu/software/stringtie/>) with the default assembly parameters. The  
10 transcripts identified in control (no peptide) and CEPp treated samples were unified into a  
11 single set of transcripts and compared with the reference gene annotation set using Stringtie's  
12 'merge' mode. Differential expression testing was performed using DESeq2  
13 (<https://bioconductor.org/packages/release/bioc/html/DESeq2.html>). Fold changes were  
14 calculated based on average FPKM values and DEG's selected at a *p*-value cutoff of 0.05 and  
15 below.

## 16 **Differential gene expression analysis**

17 The threshold for determining the differentially expressed genes (DEGs) was set to a fold  
18 change of 1.5 ( $\log_2$  fold change  $>|0.58|$ ) and *p*-value cutoff  $<0.05$ . For assessing the common  
19 DEGs, all the up and down-regulated DEGs along with shared DEGs between AtCEP1,  
20 MtCEP1D1 and MtCEP1D2 were analyzed as Venn diagrams using Venny 2.1.0 (Oliveros,  
21 2016). The up and down-regulated DEGs were enriched for Gene Ontology (GO) terms using  
22 the online gene discovery platform, Legume IP V3 (Dai et al., 2021). GO term enrichment tool  
23 on the platform extracts GO terms from functional descriptions of protein in UniProt and  
24 InterproScan annotations. An adjusted *p*-value of  $p<0.05$  was used as a cutoff for GO terms  
25 to be considered enriched. Unique genes in the top 20 significantly enriched GO terms for all  
26 up and down-regulated DEGs were plotted. The up and down-regulated differential expression  
27 of known nitrate, phosphate and sulphate transporters were plotted as a heatmap  
28 ( $\log_2FC>|0.58|$ ), *p*-value $<0.05$ . From the differentially expressed genes, upregulated kinases  
29 and transcription factors were plotted as a heatmap ( $\log_2FC>2.0$  (corresponding to a 4-fold  
30 change in expression level), *p*-value $<0.05$ ). All plots were generated using GraphPad Prism  
31 9.0.0 (GraphPad Software, Inc.) and modified using Adobe Illustrator (Adobe Inc. 2021).

## 32 **Results**

### 33 ***A platform to measure uptake rates of multiple nutrients reveals that exogenous*** 34 ***application of synthetic peptide can directly affect nutrient uptake rates***

35 A new platform for evaluating the effect of synthetic peptides on root uptake of multiple nutrient  
36 ions was developed (Figure 1). Plants were grown in a hydroponic system (Figure 1A) and  
37 peptides of interest were applied to the nutrient solution around the root system 48 hours prior  
38 to nutrient uptake assays (Figure 1B). Plants were then transferred to small assay tubes  
39 containing nutrient solution with defined levels of nutrient ions and the respective peptide,  
40 which was sampled over a short-duration into a deep-well collection plate (Figure 1C). The  
41 anion and cation concentrations of the collected samples were determined using ion  
42 chromatography. A decline in ion concentration in the assay solution over time indicated a

1 linear rate of net uptake of the ions (Figure 1D, Figure S1). “Specific” nutrient uptake rates  
2 were calculated by dividing ion uptake rate by total root length obtained from image analysis.  
3 In a proof-of-concept experiment, exogenous application of *Medicago SSP MtCEP1D1*  
4 increased the specific rate of nitrate uptake by 70-140% at low external concentrations (100  
5 and 500  $\mu\text{M}$ ,  $p < 0.05$  and  $p < 0.001$ , respectively) but not higher concentrations (1 and 5 mM)  
6 in treated plants compared to non-treated controls (Figure 1E).  
7

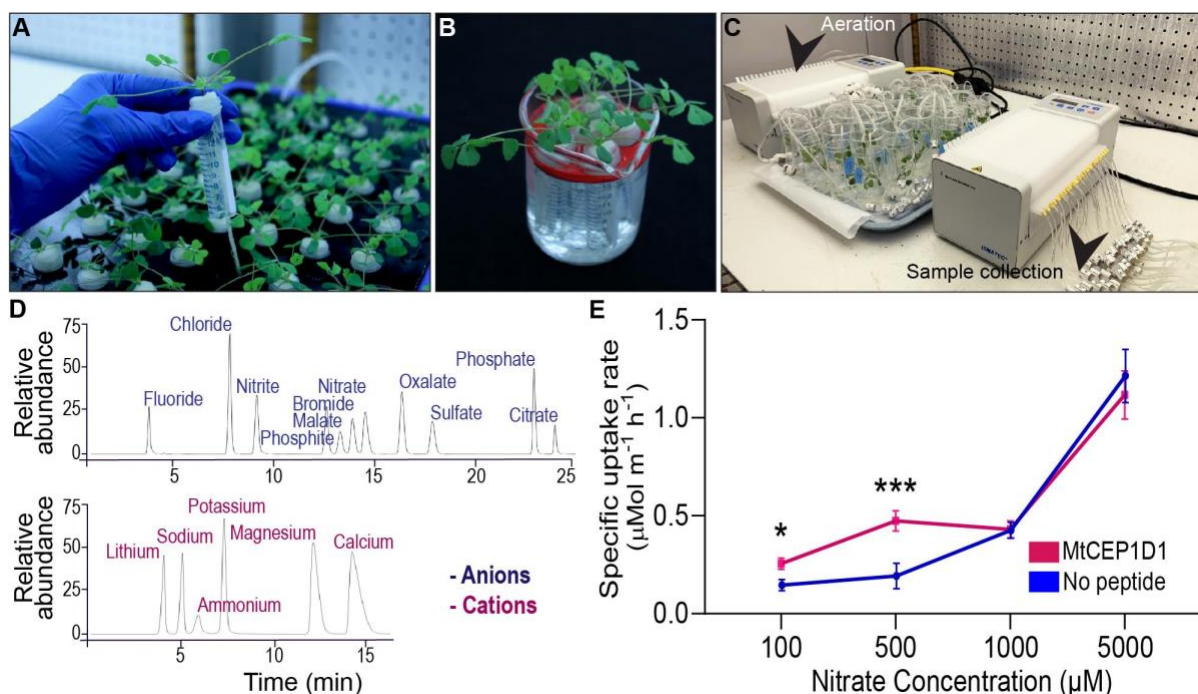

8  
9 **Figure 1. A phenotyping platform for determining uptake rates of multiple ions**  
10 **simultaneously.** (A) *Medicago truncatula* plants grown in aerated hydroponic tanks for eleven  
11 days. (B) Treatment of plants in nutrient deprivation solution for 48 hours with 1  $\mu\text{M}$  added  
12 peptide of interest. (C) Nutrient uptake assay consisting of 24 hydroponic chambers with one  
13 plant each. (D) Determination of nutrient concentrations in collected samples by ion  
14 chromatography. Time of elution determined for eleven cations and six anions using known  
15 standard solutions. (E) Enhanced specific nitrate uptake rate in the high-affinity range (100-  
16 500  $\mu\text{M}$ ) resulting from pre-treatment with 100 nM MtCEP1D1 Student's t-test \* $p < 0.05$ ,  
17 \*\*\* $p < 0.001$ .  $n = 4-6$  per sample.

### 18 ***CEP1* peptide alters root system architecture**

19 To determine if expression of MtCEP1 was regulated by multiple nutrient stresses, we grew  
20 *M. truncatula* seedlings on agarose plates containing nutrients for optimal growth (B & D Full  
21 Nutrition medium) for three days. Seedlings were deprived of specific macronutrients for 48  
22 hours before quantitative RT-PCR estimation of endogenous *MtCEP1* transcript abundance.  
23 Notably, nitrogen deprivation significantly enhanced *MtCEP1* transcript abundance ( $p < 0.01$ )  
24 but not phosphate and sulfate deprivation (Figure 2A). To elucidate the functions of CEP1  
25 peptides and identify key peptide domains, Arabidopsis CEP1 peptide (AtCEP1) and the *M.*  
26 *truncatula* CEP1 (MtCEP1) domain 1 and domain 2 peptides (Figure 2) were applied to agar  
27 upon which seedlings were grown, after which root system architecture was analyzed. In

1 agarose, exogenous application of either Arabidopsis or Medicago CEP1 domain 1 (AtCEP1  
 2 and MtCEP1D1) significantly reduced lateral root number by ~50% in Medicago as was  
 3 previously reported ( $p < 0.01$  and  $p < 0.05$  respectively; Figure 2BC; Imin et al., 2013). The  
 4 median number of lateral roots in the presence of MtCEP1D2 was lower than control but was  
 5 not statistically significant. This effect on root architecture was not observed under conditions  
 6 used for measuring uptake post 48 hour peptide application (Figure S2).

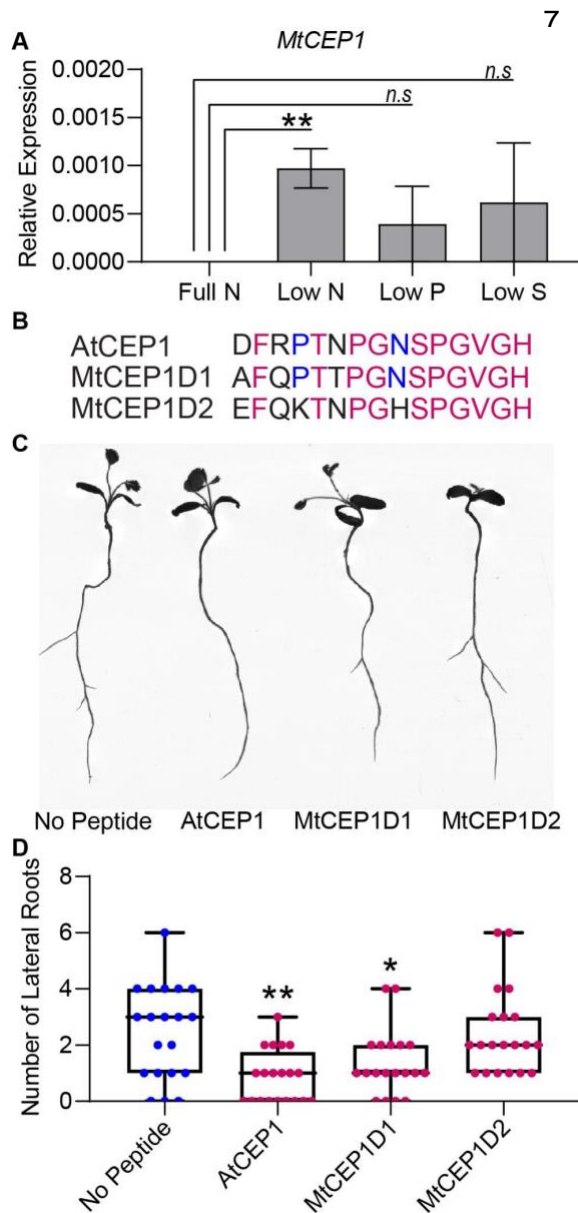

**Figure 2. Macronutrient stress responsive expression of CEP1 and effects of synthetic peptides on root system architecture in *Medicago truncatula*** (A) Relative *MtCEP1* transcript abundance in *M. truncatula* seedling roots deprived of a specific macronutrient for 48 hours. Transcript levels were measured by qRT-PCR, normalized to two housekeeping genes, *UBC* and *PTB*, and expressed relative to the level of *MtCEP1* transcript at full nutrition (Full N). Data are averages of three biological replicates in each case. Error bars represent SEM. Student's t-test  $*p < 0.05$ . (B) Sequences of peptides used in this study. Magenta indicates amino acid residues conserved between all three sequences and blue represents residues conserved between AtCEP1 and MtCEP1D1. Prolines in the fourth and eleventh positions of each peptide were hydroxylated. (C) Representative root scans showing change in root architecture of *M. truncatula* Jemalong A17 seedlings treated with 1  $\mu$ M peptide compared to no peptide controls. (D) Effect of 1  $\mu$ M peptide application on lateral root number in *M. truncatula* Jemalong A17 seedlings seven days post germination. One way ANOVA followed by Dunnett's Multiple comparison test  $*p < 0.05$ ,  $**p < 0.01$ .



## 1 CEP1 peptides enhance uptake of nitrate, phosphate and sulfate in *Arabidopsis* and 2 *Medicago*

3 The ion uptake platform was used to measure root uptake rates of multiple nutrients  
4 simultaneously. In addition to enhancing nitrate uptake rates ( $p < 0.01$ ), application of 1  $\mu\text{M}$  of  
5 the *Arabidopsis* AtCEP1 peptide significantly enhanced phosphate and sulfate uptake in  
6 *Arabidopsis thaliana* ( $p < 0.05$ ; Figure 3A). For *M. truncatula*, both AtCEP1 and *Medicago*  
7 MtCEP1 domain 1 peptide significantly enhanced the nitrate uptake rate ( $p < 0.05$  and  $p < 0.001$ ,  
8 respectively; Figure 3B). AtCEP1 peptide did not enhance phosphate or sulfate uptake in  
9 *Medicago truncatula*, unlike MtCEP1 that enhanced uptake of both phosphate and sulfate  
10 ( $p < 0.001$  and  $p < 0.1$ , respectively; Figure 3B). Thus, MtCEP1 had a greater effect than AtCEP1  
11 on uptake rates of nitrate, phosphate and sulfate in *Medicago* (Figure 3B). In contrast, the  
12 CEP1 peptides had no effect on ammonium or potassium uptake rates in *Medicago truncatula*  
13 (Figure S3).

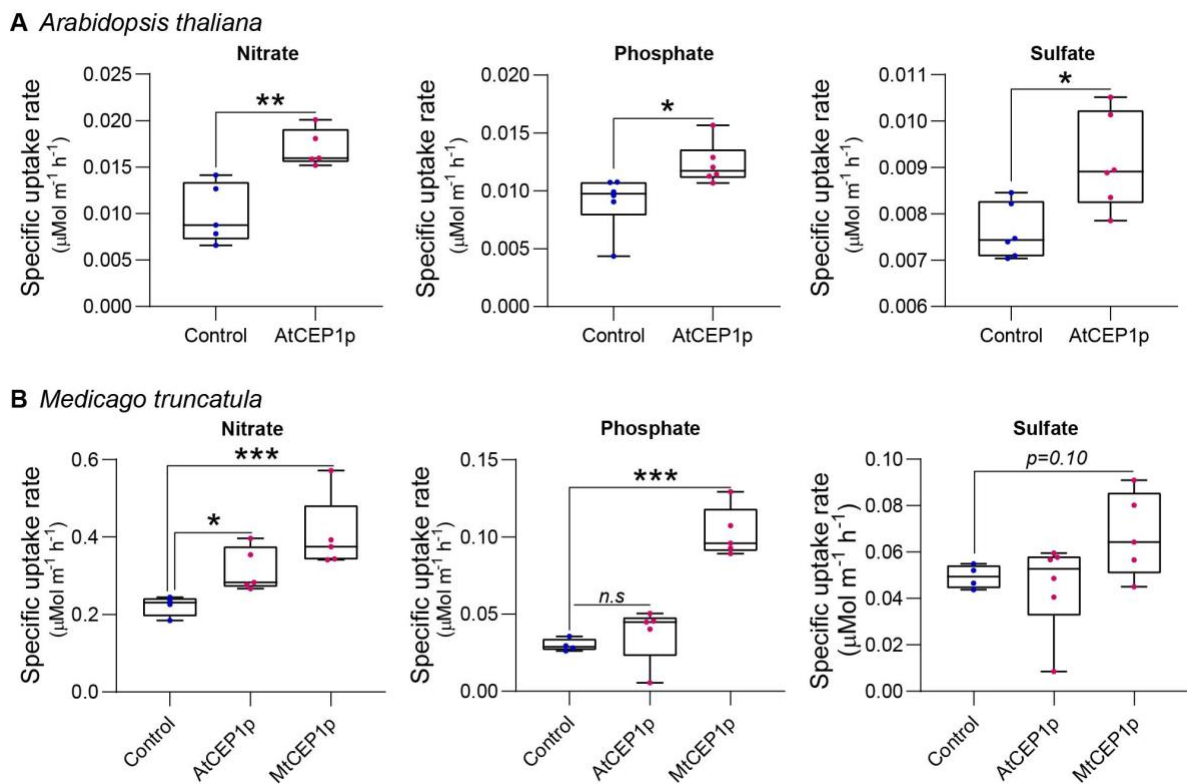

14  
15 **Figure 3. Synthetic CEP1 peptides enhance uptake of nitrate, phosphate and sulfate in**  
16 ***Arabidopsis thaliana* and *Medicago truncatula*.** (A) Specific nutrient uptake rates of nitrate,  
17 phosphate and sulfate in *Arabidopsis thaliana* in the presence or absence of the synthetic  
18 AtCEP1 peptide at a concentration of 1  $\mu\text{M}$ . (B) Uptake rate of nitrate, phosphate and sulfate  
19 in *Medicago truncatula* in the presence of synthetic AtCEP1 and MtCEP1 peptide domain 1 at  
20 a concentration of 1  $\mu\text{M}$ . Student's t-test \* $p < 0.05$ , \*\* $p < 0.01$ , \*\*\* $p < 0.001$ .  $n = 5-6$  per treatment.

## 21 ***Transcriptome responses of Medicago roots to MtCEP1 peptides***

22 Differential gene expression analysis of RNAseq data from *M. truncatula* seedling roots treated  
23 with the three CEP1 peptide variants revealed that MtCEP1D1 triggered the greatest changes  
24 in gene expression, with 2,466 genes affected by MtCEP1D1 application of which 1,349 were  
25 induced and 1,117 were repressed. Application of CEP1D2 resulted in induction of 1278 genes  
26 and repression of 871 genes. Fewer genes in Medicago were affected by treatment of plants  
27 with AtCEP1, with only 617 and 482 genes up and down regulated,  
28 respectively (Supplementary Table 1). Interestingly, 322 genes were up-regulated and 116  
29 were down-regulated by all three peptide treatments.

30  
31 Gene ontology enrichment analysis, using Legume IPV3, revealed several biological  
32 processes that were affected by CEP1 peptide treatments. Both MtCEP1D1 and AtCEP1  
33 induced expression of genes involved in cell division (GO:0008283 GO:0022402 GO:1903047  
34 GO:0000278 GO:0000280) and cell proliferation (GO:0008284). Both MtCEP1 peptides  
35 enhanced the expression of genes involved in pollination (GO:0009856), pollen-pistil  
36 interaction (GO:0048544 GO:0009875) and cell recognition (GO:0008037). Genes related to  
37 photosynthesis (GO:0015979 GO:0019684 GO:0009765 GO:0009768 GO:0009416  
38 GO:0009767 GO:0009773 GO:0010109) and oxidative stress (GO:0000302 GO:0006979  
39 GO:1901700 GO:0045454 GO:0009651 GO:0006970 GO:0042744 GO:0042743) were  
40 down-regulated in response to all three peptides. Genes involved in hormone responses were  
41 also affected by CEP1 peptides, with auxin response genes being repressed by both MtCEP1  
42 peptide domains. Upregulation of genes responsible for phosphatase activity (GO:001092)  
43 and ABA response (GO:0009738 GO:0071215 GO:0009737) following CEP1D2 application  
44 were also found (Supplementary Table 2).

45  
46 Given the observed increase in nitrate, phosphate and sulfate uptake in response to CEP1  
47 peptides, we looked for changes in the expression of gene families involved in these  
48 processes, namely the NITRATE/PEPTIDE TRANSPORTER (NRT/PTR), PHOSPHATE  
49 TRANSPORTER (PHT) and SULFATE TRANSPORTER (SULTR) families (Supplementary  
50 Table 3). Of the 117 NRT transporter encoding-genes analyzed, 17 were differentially  
51 expressed following application of peptides of which seven were induced by MtCEP1D1. One  
52 putative sulfate transporter gene, an ortholog of *AtSULTR3;5* (Medtr6g086170), was highly  
53 induced by all CEP peptide domains. In our data, we found no PHT phosphate transporter  
54 genes significantly induced by the CEP1p application..

55 Finally, we wanted to identify signaling pathway genes that responded to CEP1 application,  
56 which might be interesting targets for breeding crops with enhanced sensitivity to such  
57 peptides. We analyzed the top 15% of genes induced by the peptides and focused on those  
58 involved in perception and/or relay of signals, especially kinases and transcription factors  
59 (Supplementary Table 4). Four kinases: Cyclin dependent Kinase (Medtr8g461270),  
60 Serine/Threonine Kinase (Medtr7g056617) and an LRR receptor like kinase  
61 (MT4Noble\_051661; Medtr2g019170) were highly induced by all three CEP1 peptides. Four  
62 Myb transcription factors were also induced by all three peptides. MADS-box transcription  
63 factor gene Medtr6g015975 was highly induced by both MtCEP1 domain 1 and 2 peptides,  
64 while Medtr4g109830 was induced only by MtCEP1\_D2p.

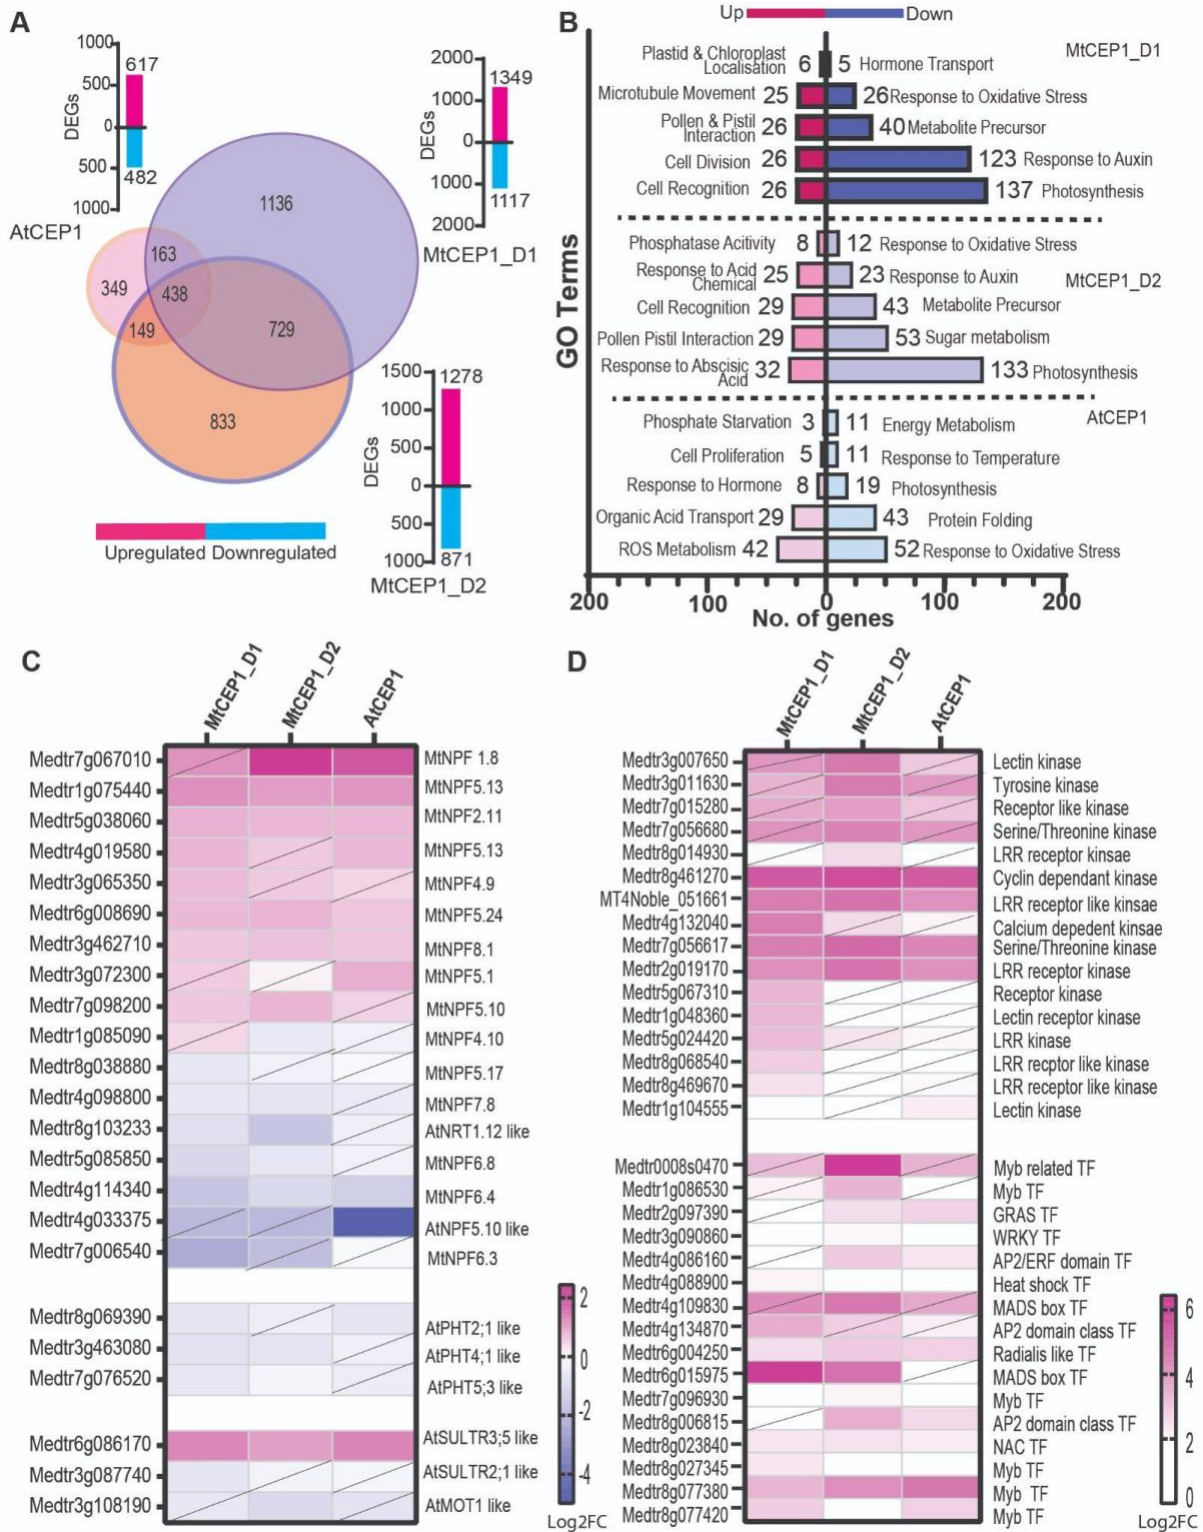

65  
66

67 **Figure 4. Differential gene expression analysis** (A) Venn diagram showing number of  
68 differentially expressed genes following application of AtCEP1p and MtCEP1 peptide domain  
69 1 and 2 in *M. truncatula* (FC>1.5,  $p<0.05$ ). Shared genes are indicated in the overlapping  
70 region between peptide treatments. Corresponding histogram shows the total number of  
71 DEGs. (B) Histogram showing the top twenty significantly enriched GO terms in up and down-  
72 regulated genes ( $q<0.05$ ). (C) Heat map of putative nitrate and sulphate transporter genes

73 affected by MtCEP1D1, MtCEP1D2 and AtCEP1 peptide treatment in *M. truncatula* (FC>1.5,  
74 p<0.05, diagonal line indicates statistically insignificant value). (D) Comparative analysis of  
75 CEP1-responsive kinases and transcription factor genes in *M. truncatula* (FC>1.5, p<0.05,  
76 diagonal line indicates statistically insignificant value). Average values of three biological  
77 replicates are represented. TF stands for Transcription Factor.

## 78 Discussion

79 Small signaling peptides are known to perform a wide variety of roles in plant growth and  
80 development. However, studies exploiting synthetic SSPs to address agronomically important  
81 physiological traits such as root nutrient uptake are scarce. Here, we devised a novel  
82 hydroponics-based nutrient uptake screen for high-throughput assessment of SSPs function  
83 in modifying root nutrient uptake in Medicago and Arabidopsis. We showed that exogenous  
84 application of synthetic SSPs can affect plant nutrient uptake rates, expressed per unit root  
85 length to avoid potential confounding effects related to changes in root system architecture.  
86 Although treating *M. truncatula* plants with CEP1 peptides for short periods had no effect on  
87 total root length. As thousands of SSPs are produced by plants, this nutrient uptake  
88 phenotyping screen promises to be valuable for identifying and characterizing novel peptides  
89 involved in plant nutrition, which may find application as natural plant growth stimulants in  
90 agriculture.

91  
92 Nitrate is a key macronutrient for plant growth and development and CEP1 peptides play a  
93 major role in ensuring plants have sufficient nitrogen for growth when N-availability in soil is  
94 heterogeneous or scarce (Tabata et al., 2014; Ohkubo et al., 2017; Laffont et al., 2020). Under  
95 N-deficiency stress, roots produce CEP peptides, which serve as 'N-hunger signals' that are  
96 perceived by receptors in the shoot, which in turn activate further signaling that induces  
97 expression of nitrate transporters in roots within N-rich soil patches (Chapman et al.,  
98 2020) Tabata et al 2014; (Chapman et al., 2020); Figure 2A). Using the Arabidopsis *cepr*  
99 receptor mutants, Tabata et al. (2014), showed that less radiolabelled nitrate accumulated in  
100 mutant roots compared to the wild type. Multiple studies demonstrate the effect of externally  
101 applied synthetic CEP peptides on root architecture however, effects on nitrate uptake of direct  
102 CEP peptide application to plant roots has not been demonstrated before (Imin et al., 2013;  
103 Chapman K., et al., 2020). Using a novel nutrient uptake platform, we showed that 48 hour  
104 exposure of roots to exogenously applied CEP1 peptides at concentrations of 100 nM and 1  
105  $\mu$ M can enhance nutrient uptake rates per unit root length of Medicago 70 and 140%,  
106 respectively (Figure 1 E). These are physiologically relevant concentrations of nitrate typically  
107 found in agricultural soils, which are accessed by so-called high affinity nitrate transporters  
108 (Lark et al., 2004; Miller et al., 2007). At higher nitrate concentrations (>1000  $\mu$ M), where low-  
109 affinity nitrate transport systems dominate, no significant difference was observed between  
110 peptide treated plants and controls, indicating that CEP1 peptides control high- but not low-  
111 affinity transport of nitrate (Figure 1E). Accordingly, transcriptome analyses revealed that at  
112 least seven putative NRT/NPF transporters family genes encoding members of both NRT1  
113 dual affinity transporters and NRT2 high-affinity transporters upregulated by peptide treatment  
114 as early as three hours post application (Figure 4C). Since gene overexpression studies fail  
115 to discriminate between D1 and D2 peptide domains within the polypeptide sequence encoded  
116 by the MtCEP1 gene, our study demonstrates that MtCEP1Domain1 alone is sufficient to  
117 induce uptake of nitrate from the surrounding media.

118

119 Our nutrient uptake methodology can be scaled up or down depending on the seedling size.  
120 Using both Arabidopsis (10 plants per replicate) and Medicago (one plant per replicate) we  
121 were able to detect measurable changes in uptake of nitrate, phosphate and sulfate within 4-  
122 8 hours (Figure 3 A, B, Supplementary Figure 2). Additionally, both the Arabidopsis and  
123 Medicago CEP1 domains, AtCEP1 and MtCEP1D1, enhanced Medicago nitrate uptake rate  
124 indicating that the CEP signaling pathway and peptide function is conserved across species.  
125 Since N-uptake rates induced by MtCEP1D1 were 30% higher than those induced by AtCEP1,  
126 some specificity at the species appears to exist, possibly at the level of the peptide receptor  
127 which would be expected to have a higher affinity to its endogenous peptide ligand than to  
128 that of another plant species. However, given that effects on root system architecture,  
129 including important foraging traits such as initiation of lateral roots, are more negatively  
130 affected by AtCEP1 than by MtCEP1 peptide domain 1 or 2 (Figure 2 B, C), more work is  
131 needed to understand the differential effects of these peptides. Likewise, further  
132 investigation of CEP peptide dosage and length of exposure is required before use in  
133 agriculture.

134

135 Interestingly, we observed that application of CEP1 on both Medicago and Arabidopsis  
136 enhanced uptake not only of nitrate, but also phosphate and sulfate (Figure 3 A, B). Given that  
137 MtCEP1 is uniquely responsive to nitrogen deficiency but not phosphate or sulfate deficiency  
138 (Figure 2A), these results were unexpected. Tabata et al. 2010, did not report any change in  
139 P or S uptake in Arabidopsis in response to CEP1 application, although they did find  
140 upregulation of *AtPHT1.1* and *AtPHT1.4* in addition to NRT transporters, after 24 hours of  
141 peptide treatment. However, recent work utilizing this uptake platform to screen for genetic  
142 diversity of nutrient uptake rates in maize germplasm found that the uptakes rates of various  
143 nutrients, as well as root respiration, are generally positively correlated (Griffiths et al., 2021).  
144 This presumably reflects the need to balance uptake of different nutrients with the demand for  
145 metabolism and growth, dictated by the overall stoichiometry of elements in the plant, with  
146 faster growth requiring increased uptake of all essential nutrients and greater energy  
147 consumption. Part of this energy consumption will drive energization of cellular membranes,  
148 which in turn drives transport of various nutrients into and around cells and tissues. This may  
149 account for part of the apparent coordination in nutrient uptake observed in this and other  
150 studies. No doubt, however, full coordination requires control at many levels, including the  
151 genetic level as exemplified by changes in gene expression, as observed here.

152

153 To begin to understand how CEP peptides alter root nutrient uptake and development, we  
154 conducted RNAseq on *M. truncatula* roots three hours post treatment with the three different  
155 peptides (Figure 4). Our analysis revealed that the peptide MtCEP1D1 (1349 DEGs) had the  
156 largest effect on the Medicago transcriptome, followed by MtCEP1D2 (1278 DEGs) and  
157 AtCEP1 (617 DEGs). This is consistent with our observation that application of MtCEP1D1 on  
158 *M. truncatula* roots increases uptake of nitrate by 30% more than AtCEP1 (Figure 3). GO  
159 enrichment analysis revealed that both MtCEP1 peptide domains decreased auxin related  
160 gene expression. Repression of auxin signaling, transport and/or biosynthesis could explain  
161 the developmental changes that accompany CEP1p applications, including reduction in LR  
162 number (Figure 4B, Figure 2C). This corroborates the finding that CEP1 application represses  
163 auxin biosynthesis and alters auxin transport in Medicago roots to affect gravitropic responses

164 in roots (Chapman et al., 2020). Moreover, application of both MtCEP1 domain encoding  
165 peptides decreased energy metabolism-related processes and sugar metabolism required for  
166 plant growth and development, consistent with the associated decrease in total root length.  
167 Enrichment of GO categories related to cell recognition (MtCEP1D1) and phosphatase activity  
168 (MtCEP1D2) are consistent with the role of MtCEP1 as a signaling peptide controlling various  
169 physiological responses. A targeted search of transporters involved in N, P, and S uptake in  
170 *Medicago* yielded several nitrate transporters and one sulfate transporter that were  
171 upregulated by application of CEP peptides. Increased transporter density on the root  
172 exodermis is commonly believed to enhance uptake, but other mechanisms may exist such  
173 as allelic diversity, increased assimilation to decrease internal cellular concentrations, and  
174 increased counter-ion efflux (Griffiths and York, 2020). Further functional characterization  
175 using Tnt1 insertion mutants or gene editing technologies will help to understand the  
176 contribution of specific “downstream” genes controlled by CEP1 signaling and the observed  
177 changes in root function. The absence of a clear candidate phosphate transporter that is  
178 transcriptionally regulated by the CEP peptides points to alternative mechanisms of controlling  
179 phosphate uptake under these conditions. One such possibility is the involvement of sulfate  
180 transporters in phosphate uptake, given the observation that SULTR3;5 was also shown to  
181 mediate accumulation of inorganic phosphate in rice (Yamaji et al., 2016) and our observation  
182 that SULTR genes are induced by CEP peptides in *Medicago* (Figure 4 C). Finally, our data  
183 also revealed novel candidate genes that may be involved in CEP1 signal perception and  
184 relay. These included several Myb-domain containing transcription factors, WRKY, GRAS  
185 domain, and ERF (AP2 ERF) transcription factors. Although a previous study overexpressing  
186 CEP1 in hairy roots of *M. truncatula* found the same family of TFs, the gene IDs were different  
187 (Imin et al., 2013) possibly due to differences in the age of plants used and the unique nature  
188 of transgenic “hairy” roots. We identified several LRR-RL kinases that were preferentially  
189 upregulated by MtCEP1D1 application (Medtr5g024420, Medtr8g068540, Medtr8g469670).  
190 This suggests that MtCEP1D1 may initiate signaling in distinct downstream pathways.

191  
192 In summary, using a novel nutrient uptake analysis platform, we have found that exogenous  
193 application of specific synthetic peptides of the CEP1 family can significantly enhance nitrate  
194 uptake in *Arabidopsis* and *Medicago* by as much as 70-140% at low nutrient levels (Figure  
195 1C). Previously, synthetic peptides have been reported to affect developmental processes .  
196 Here we show that application of a peptide can affect transcription of transporter genes and  
197 enhance nutrient uptake processes. Based on these results, SSPs show promise in  
198 horticulture, and agriculture more generally, through use in hydroponic and fertigation  
199 systems, as well as part of seed coat treatments, which would place them in close proximity  
200 to plant seedlings and roots upon germinations. Implementation of nutrient uptake enhancing  
201 SSPs in agriculture could help drive greater nutrient capture whilst minimizing nutrient losses.

202  
203 **Supplementary figures**  
204

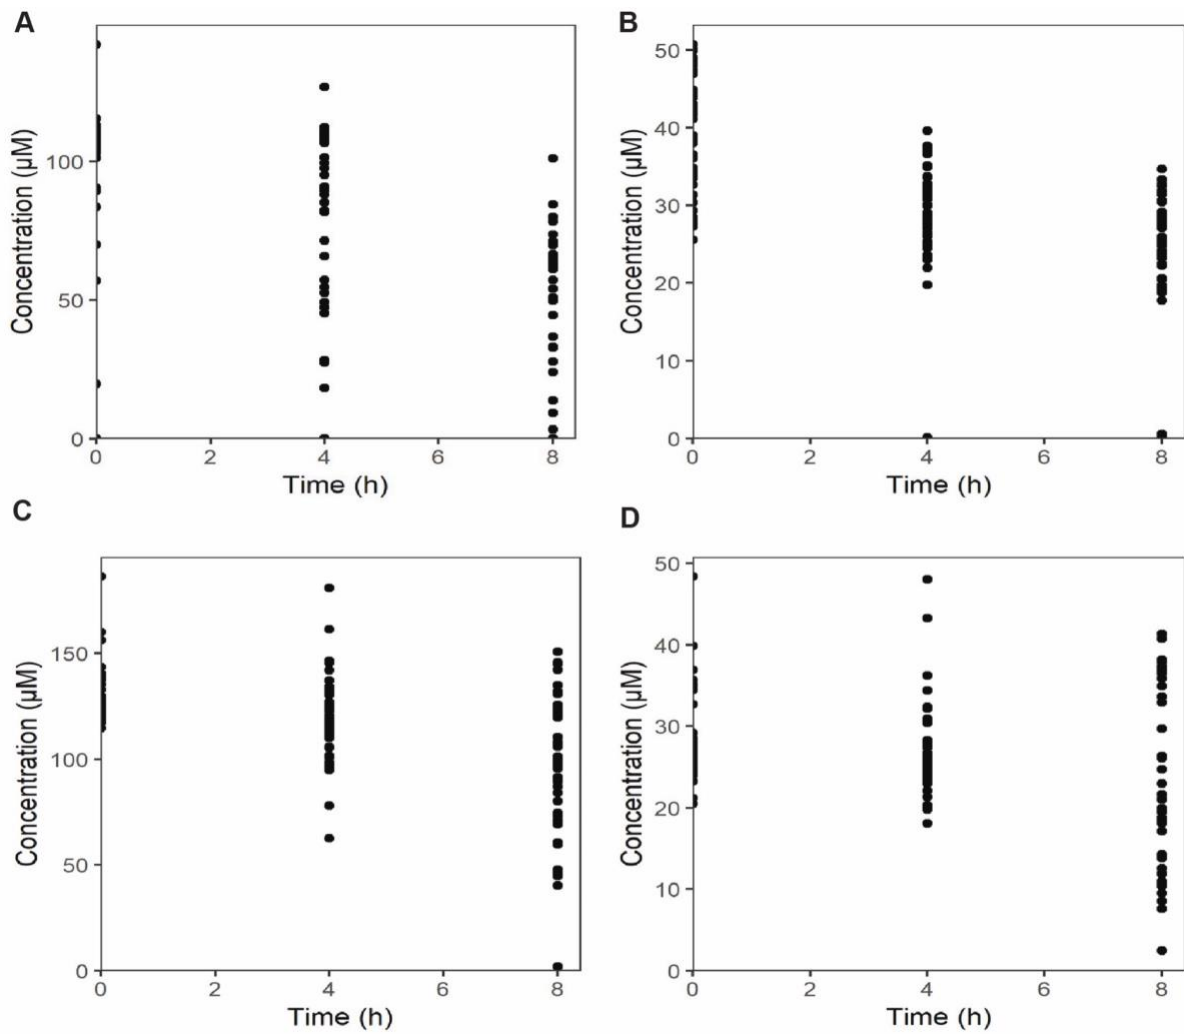

205  
206  
207  
208  
209  
210  
211  
212

**Figure S1.** Dot plots showing nutrient uptake in 48 different plant roots treated with different peptides over 8 hours as measured by the uptake platform. Nutrient depletion plots show raw data not normalized for root length. Uptake was measured for A. Nitrate B. Phosphate C. Sulfate and D. Potassium. Each peptide and control had six replicates each.

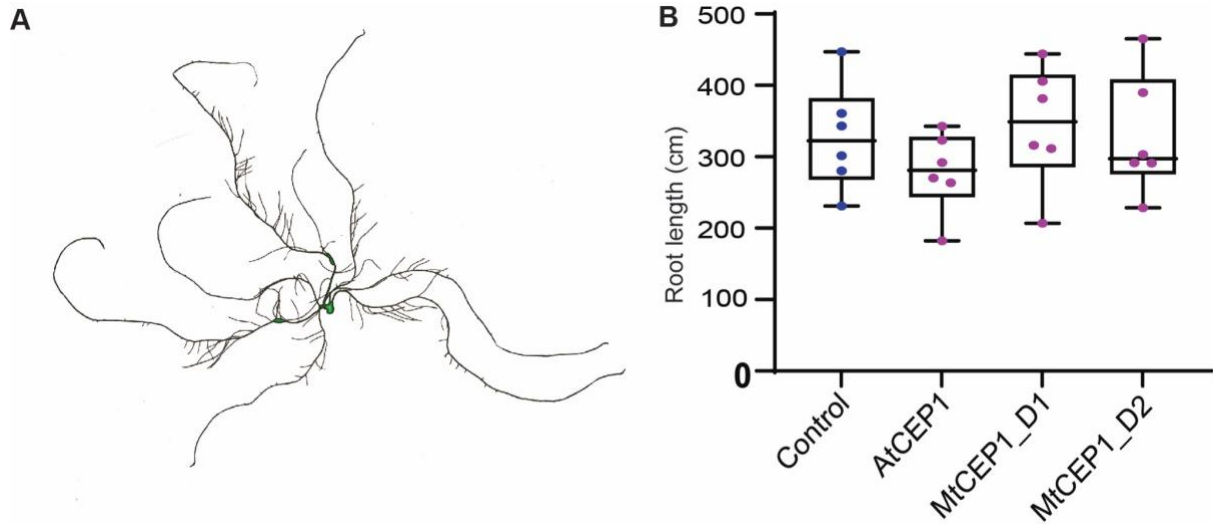

213  
214  
215  
216  
217  
218  
219

**Figure S2.** A. Rhizovision output showing representative root scan used for measuring total root length. B. Box plot showing difference in root length post treatment with peptides. No significant differences were found using a two way ANOVA followed by a Dunnett's multiple comparison test.

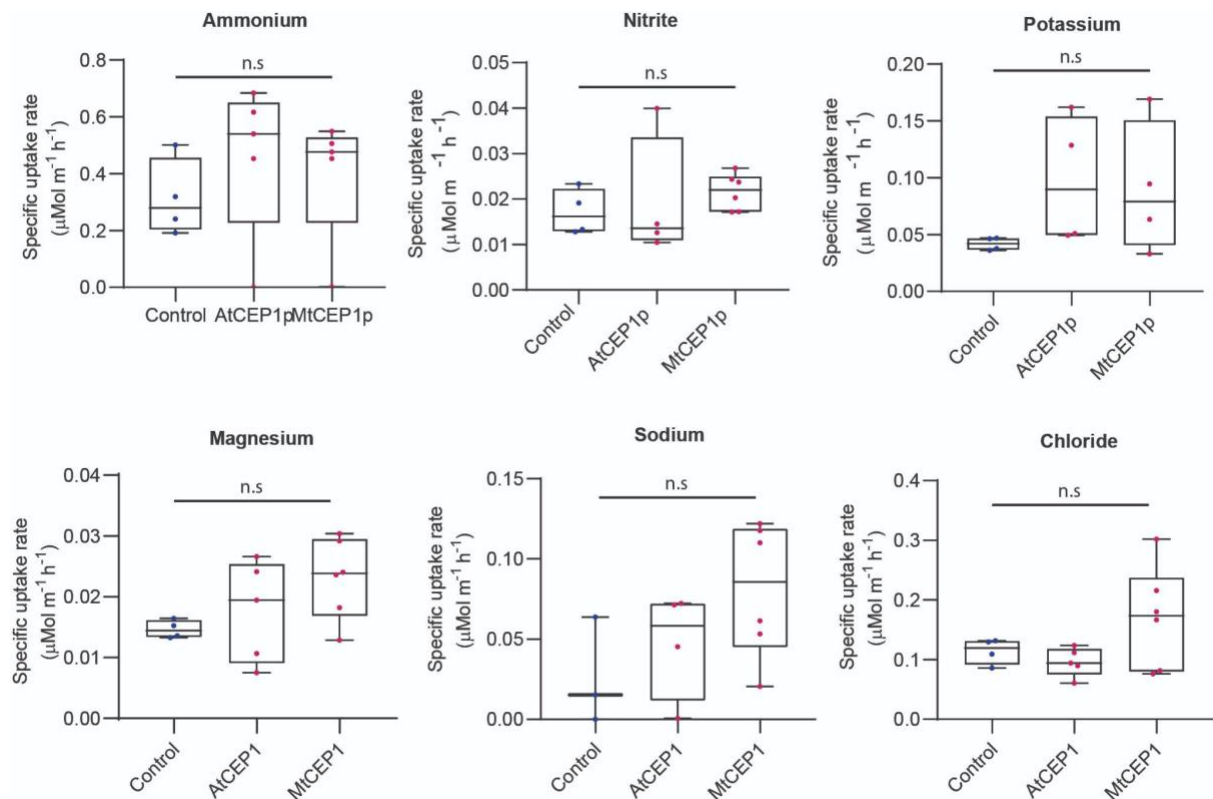

220  
221  
222  
223  
224  
225  
226

**Figure S3.** CEP1 has no significant effect on uptake of additional nutrients tested. Specific nutrient uptake rates of ammonium, nitrite, potassium, Magnesium, Sodium, Chloride as indicated in *M. truncatula* in the presence of the synthetic AtCEP1 peptide and MtCEP1D1 at a concentration of 1  $\mu\text{M}$ . Student's t-test \* $p < 0.05$ , \*\* $p < 0.01$ , \*\*\* $p < 0.001$ .  $n = 5-6$  per treatment.



## 227 **Supplementary Tables**

228 Supplementary Table 1: Transcript per million (TPM) counts, DESeq2 results and  
229 differentially expressed genes under MtCEP1D1, MtCEP1D2 and AtCEP1 application.

230

231 Supplementary Table 2: Gene Ontology analysis of DEGs under application of synthesized  
232 CEP1 peptide domains and unique genes in top GO terms.

233

234 Supplementary Table 3: NRT/PTR, PHT and SULTR families under application of the CEP1  
235 peptide domains.

236

237 Supplementary Table 4: Transcription factors and kinases in top15% upregulated genes  
238 induced by CEP1 peptide domains, primer sequences and nutrient media composition.

## 239 **Acknowledgements**

240 We would like to thank David Huhman for help with ion content measurement, Lynne Jacobs  
241 for help growing plants, and Kim Spiering for technical support. This work was funded by the  
242 National Science Foundation award #1444549 to Wolf R. Schieble and M.K Udvardi; USDA-  
243 NIFA award #2017-67007-25948 to Larry M. York; the Center for Bioenergy Innovation, a U.S.  
244 Department of Energy Bioenergy Research Center supported by the Office of Biological and  
245 Environmental Research in the DOE Office of Science; and the Lloyd Summer Noble Summer  
246 Scholar grant to S. Roy and M. Griffiths.

## 247 **Conflict of Interest**

248 The authors would like to declare no conflicts of interest.

## 249 **Author Contributions**

250 W.R.S, M.K.U and S.R conceptualized the peptide assays and interpreted results,  
251 L.M.Y. and M.G conceptualized and implemented the nutrient uptake measurement  
252 platform, M.G created the R scripts for data analyses, S.R. and M.G designed  
253 experiments, S.R, M.G, I.T.J, B.C, L.A, S.Z, D.J, N.D.K performed experiments and  
254 analyzed data, S.R, M.G, W.R.S, M.K.U, L.M.Y, wrote this manuscript with input from  
255 all authors.

## 256 **References**

257 Bao, Z., Clancy, M. A., Carvalho, R. F., Elliott, K., and Folta, K. M. (2017). Identification of Novel  
258 Growth Regulators in Plant Populations Expressing Random Peptides. *Plant Physiol.* 175, 619–  
259 627.

260 Breakspear, A., Liu, C., Roy, S., Stacey, N., Rogers, C., Trick, M., et al. (2014). The Root Hair  
261 “Infectome” of *Medicago truncatula* Uncovers Changes in Cell Cycle Genes and Reveals a  
262 Requirement for Auxin Signaling in Rhizobial Infection. *Plant Cell* 26, 4680–4701.

263 Chapman, K., Ivanovici, A., Taleski, M., Sturrock, C. J., Ng, J. L. P., Mohd-Radzman, N. A., et al.  
264 (2020). CEP receptor signalling controls root system architecture in *Arabidopsis* and *Medicago*.  
265 *New Phytol.* 226, 1809–1821.

- 266 Dai, X., Zhuang, Z., Boschiero, C., and Dong, Y. (2021). LegumeIP V3: from models to crops—an  
267 integrative gene discovery platform for translational genomics in legumes. *Nucleic Acids*.  
268 Available at: <https://academic.oup.com/nar/article-abstract/49/D1/D1472/5964081>.
- 269 de Bang, T. C., Lay, K. S., Scheible, W.-R., and Takahashi, H. (2017a). Small peptide signaling  
270 pathways modulating macronutrient utilization in plants. *Curr. Opin. Plant Biol.* 39, 31–39.
- 271 de Bang, T. C., Lundquist, P. K., Dai, X., Boschiero, C., Zhuang, Z., Pant, P., et al. (2017b). Genome-  
272 Wide Identification of Medicago Peptides Involved in Macronutrient Responses and Nodulation.  
273 *Plant Physiol.* 175, 1669–1689.
- 274 Fageria, N. K. (2008). *The use of nutrients in crop plants*. Boca Raton, FL: CRC Press  
275 doi:10.1201/9781420075113.
- 276 Ghorbani, S., Lin, Y.-C., Parizot, B., Fernandez, A., Njo, M. F., Van de Peer, Y., et al. (2015).  
277 Expanding the repertoire of secretory peptides controlling root development with comparative  
278 genome analysis and functional assays. *J. Exp. Bot.* 66, 5257–5269.
- 279 Griffiths, M., Roy, S., Guo, H., Seethepalli, A., Huhman, D., Ge, Y., et al. (2021). A multiple ion-uptake  
280 phenotyping platform reveals shared mechanisms affecting nutrient uptake by roots. *Plant*  
281 *Physiol.* 185, 781–795.
- 282 Griffiths, M., and York, L. M. (2020). Targeting Root Ion Uptake Kinetics to Increase Plant Productivity  
283 and Nutrient Use Efficiency. *Plant Physiol.* 182, 1854–1868.
- 284 Hastwell, A. H., de Bang, T. C., Gresshoff, P. M., and Ferguson, B. J. (2017). Author Correction: CLE  
285 peptide-encoding gene families in *Medicago truncatula* and *Lotus japonicus*, compared with those  
286 of soybean, common bean and *Arabidopsis*. *Scientific Reports* 7. doi:10.1038/s41598-017-  
287 14991-9.
- 288 Hawkesford, M. J., and Barraclough, P. (2011). *The molecular and physiological basis of nutrient use*  
289 *efficiency in crops*. Chichester, West Sussex; Hoboken, NJ: Wiley-Blackwell.
- 290 Imin, N., Mohd-Radzman, N. A., Ogilvie, H. A., and Djordjevic, M. A. (2013). The peptide-encoding  
291 CEP1 gene modulates lateral root and nodule numbers in *Medicago truncatula*. *J. Exp. Bot.* 64,  
292 5395–5409.
- 293 Laffont, C., Ivanovici, A., Gautrat, P., Brault, M., Djordjevic, M. A., and Frugier, F. (2020). The NIN  
294 transcription factor coordinates CEP and CLE signaling peptides that regulate nodulation  
295 antagonistically. *Nat. Commun.* 11, 1–13.
- 296 Matsubayashi, Y. (2014). Posttranslationally modified small-peptide signals in plants. *Annu. Rev.*  
297 *Plant Biol.* 65, 385–413.
- 298 Murphy, E., Smith, S., and De Smet, I. (2012). Small signaling peptides in *Arabidopsis* development:  
299 how cells communicate over a short distance. *Plant Cell* 24, 3198–3217.
- 300 Notaguchi, M., and Okamoto, S. (2015). Dynamics of long-distance signaling via plant vascular  
301 tissues. *Front. Plant Sci.* 6, 161.
- 302 Oelkers, K., Goffard, N., Weiller, G. F., Gresshoff, P. M., Mathesius, U., and Frickey, T. (2008).  
303 Bioinformatic analysis of the CLE signaling peptide family. *BMC Plant Biol.* 8, 1.
- 304 Ogilvie, H. A., Imin, N., and Djordjevic, M. A. (2014). Diversification of the C-TERMINALLY  
305 ENCODED PEPTIDE (CEP) gene family in angiosperms, and evolution of plant-family specific  
306 CEP genes. *BMC Genomics* 15, 870.
- 307 Ohkubo, Y., Tanaka, M., Tabata, R., Ogawa-Ohnishi, M., and Matsubayashi, Y. (2017). Shoot-to-root  
308 mobile polypeptides involved in systemic regulation of nitrogen acquisition. *Nature Plants* 3, 1–6.
- 309 Okuda, S., Tsutsui, H., Shiina, K., Sprunck, S., Takeuchi, H., Yui, R., et al. (2009). Defensin-like

- 310 polypeptide LUREs are pollen tube attractants secreted from synergid cells. *Nature* 458, 357–  
311 361.
- 312 Oliveros, J. C. (2016). Venny 2.1. 0. *Venny. An Interactive Tool for Comparing Lists with Venn's*  
313 *Diagrams. (2007-2015). Available online at: <http://bioinfogp.cnb.csic.es/tools/venny/>(Accessed*  
314 *February 15, 2016).*
- 315 Roy, S., Lundquist, P., Udvardi, M., and Scheible, W.-R. (2018). Small and mighty: Peptide hormones  
316 in plant biology. *Plant Cell* 30, tpc118tt0718.
- 317 Seethepalli, A., Dhakal, K., Griffiths, M., Guo, H., Freschet, G. T., and York, L. M. (2021). RhizoVision  
318 Explorer: Open-source software for root image analysis and measurement standardization. *AoB*  
319 *Plants*. doi:10.1093/aobpla/plab056.
- 320 Tabata, R., Sumida, K., Yoshii, T., Ohyama, K., Shinohara, H., and Matsubayashi, Y. (2014).  
321 Perception of root-derived peptides by shoot LRR-RKs mediates systemic N-demand signaling.  
322 *Science*. Available at: <https://science.sciencemag.org/content/346/6207/343> [Accessed  
323 September 14, 2021].
- 324 Tavormina, P., De Coninck, B., Nikonorova, N., De Smet, I., and Cammue, B. P. A. (2015). The Plant  
325 Peptidome: An Expanding Repertoire of Structural Features and Biological Functions. *Plant Cell*  
326 27, 2095–2118.
- 327 Team, R. C. (2020). R: A language and environment for statistical computing (v. 4.0. 2)[Computer  
328 software]. R Foundation for Statistical Computing.
- 329 Wang, S., Tian, L., Liu, H., Li, X., Zhang, J., Chen, X., et al. (2020). Large-Scale Discovery of Non-  
330 conventional Peptides in Maize and Arabidopsis through an Integrated Peptidogenomic Pipeline.  
331 *Mol. Plant* 13, 1078–1093.
- 332 Wortmann, C. S., Sander, D. H., Penas, E. J. (2014). “Winter Wheat,” in *Nutrient Management for*  
333 *Agronomic Crops in Nebraska*, 82–90.
- 334 Yamaji, N., Takemoto, Y., Miyaji, T., Mitani-Ueno, N., Yoshida, K. T., and Ma, J. F. (2016). Reducing  
335 phosphorus accumulation in rice grains with an impaired transporter in the node. *Nature* 541, 92–  
336 95.
- 337 Lark, R. M., Milne, A. E., Addiscott, T. M., Goulding, K. W. T., Webster, C. P., & O’Flaherty, S. (2004).  
338 Scale- and location-dependent correlation of nitrous oxide emissions with soil properties: An  
339 analysis using wavelets. *European Journal of Soil Science*, 55(3), 611–627.  
340 <https://doi.org/10.1111/j.1365-2389.2004.00620.x>
- 341 Miller, A. J., Fan, X., Orsel, M., Smith, S. J., & Wells, D. M. (2007). Nitrate transport and signalling.  
342 *Journal of Experimental Botany*, 58(9), 2297–2306. <https://doi.org/10.1093/jxb/erm066>
